# Supplementary material
Source: MDPI journal article supplement (https://www.mdpi.com/1424-2818/14/9/717)
Supplement: s1 [file s1]

Archive with 2 entries (2 files):
- Table S1 S2 S3.xlsx
- Table S4.pdf
