# Supplementary material
Source: MDPI journal article supplement (https://www.mdpi.com/1424-2818/14/9/717)
Supplement: s1 [file s1 › Table S1 S2 S3.xlsx]

## Sheet: Table S1 2018
Garshelis, D.L.; Dharaiya, N.; Sharp, T.; Pigeon, K.E. Investigating Co-occurrence among Look-alike Species: The Case of Three Bears in Northeast India. Diversity 2022, 14.
Bear climbed tree ID	4-Claw (mm)	5-Claw (mm)	Single SB mark	>1 SB mark only	SB+I marks	SB+ABB marks	Single ABB	>1 ABB marks	ABB + I marks	Only I mark
1	72	NA				1
1	64	NA
1	59	88
1	51	NA
1	43	NA
2	54	86				1
2	91	124
2	98	NA
3	63	82							1
3	70	NA
3	75	92
3	60	86
4	68	95				1
4	65	97
4	69	NA
4	55	NA
5	78	113						1
5	73	NA
5	81	125
6	68	102				1
6	61	85
6	59	83
7	63	90								1
8	58	NA				1
8	78	105
8	63	94
9	80	85					1
10	68	92					1
11	82	NA				1
11	59	NA
12	102	NA						1
12	90	124
12	101	NA
13	88	NA						1
13	NA	NA
13	70	112
13	75	115
14	72	100				1
14	50	NA
14	NA	NA
14	77	NA
15	88	115						1
15	82	116
16	81	NA						1
16	72	99
17	71	100						1
17	88	NA
17	70	NA
17	67	93
17	82	120
18	58	84				1
18	77	NA
18	60	83
18	68	94
19	62	84								1
19	NA	NA
20	69	NA						1
20	77	107
21	79	NA					1
22	79	101				1
22	79	NA
22	63	88
22	70	101
22	62	79
22	59	79
23	70	NA				1
23	67	88
23	67	95
23	55	NA
23	75	NA
24	75	100							1
24	63	84
24	75	NA
24	60	84
25	76	103						1
25	86	NA
26	78	110						1
26	71	101
27	63	91						1
27	69	102
27	67	98
28	86	NA					1
29	68	89						1
29	68	89
30	78	107						1
30	78	107
31	63	100						1
31	63	102
32	61	83				1
32	68	84
33	85	112					1
34	NA	NA						1
34	81	NA
35	65	92					1
Sum			0	0	0	11	6	14	2	2	35

## Sheet: Table S2 2022
Bear climbed tree ID	4-Claw (mm)	5-Claw (mm)	Single SB mark	>1 SB mark only	SB+I marks	SB+ABB marks	Single ABB	>1 ABB marks	ABB + I marks	Only I mark
1	67	90					1
2	74	97						1
2	77	100.3
2	79	90
3	75	90					1
4	58	87				1
4	65	90
4	92	100.3
5	91	120.8					1
6	86	120					1
7	67	90						1
7	72	93
7	90	120
7	92	111.5
8	72	98						1
8	70	100.5					1
9	72	111.5						1
10	70.1	120
10	90.4	120.3
11	90.1	100.2					1
12	70	92					1
13	75	100.6						1
13	78	111.6
14	65	85							1
	68	85
15	68	90					1
16	74	95					1
17	90						1
18	83	90					1
19	68	84					1
20	68	82					1
21	68	94				1
21	59	80
22	72	100.3					1
23	80	100.6					1
23	87	100.8					1
25	88	100.5					1
26	85	100.7					1
27	80	99					1
28	66	86								1
29	100	111.2						1
29	88	111.2
30	76	90				1
30	57	74
31	73	90							1
31	66	87
31	68	95
32	72	NA					1
33	80	90				1
33	65	77
33	69	90
34	86	111.2						1
34	76	97
35	93	111.6						1
35	71	93
36	48	68				1
36	81	90
37	68	90					1
38	78	NA					1
39	81	100.1					1
Sum			0	0	0	5	23	8	2	1	39

## Sheet: Table S3 Key
Measurement key from Steinmetz and Garshelis (2008)
4-Claw (mm)	5-Claw (mm)
>66	>90	ABB	Asiatic black bear size
<60	<82	SB	Sun bear size
60-66	82-90	I	Indeterminate
